# Supplementary material for: High-Density Genetic Map and QTL Analysis in Cunninghamia lanceolate: Insights into Growth and Wood-Color Traits
Source: MDPI journal article supplement (doi:10.3390/f14081591), 2023-08-05
Supplement: s1 [file s1]

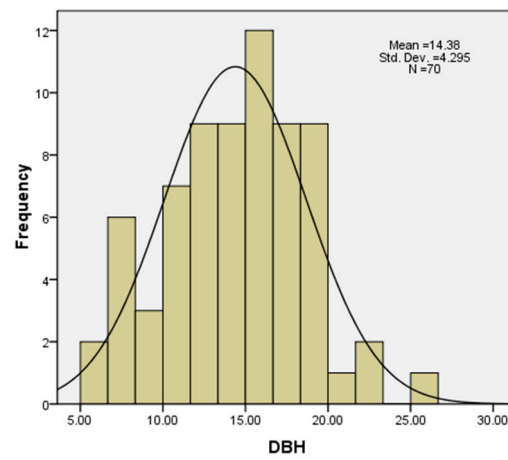

Figure S1. The frequency distribution of the diameter at breast height (DBH) of *C. lanceolata* individuals. The x-axis indicates the DBH; the y-axis indicates frequency of the DBH.

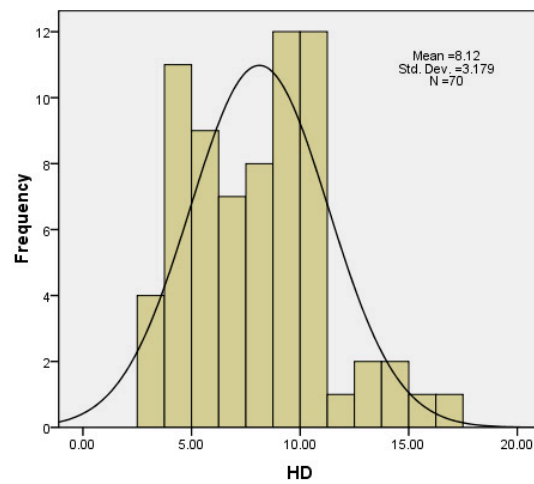

Figure S2. The frequency distribution of the heartwood diameter (HD) of *C. lanceolata* individuals. The x-axis indicates the HD; the y-axis indicates frequency of the HD.

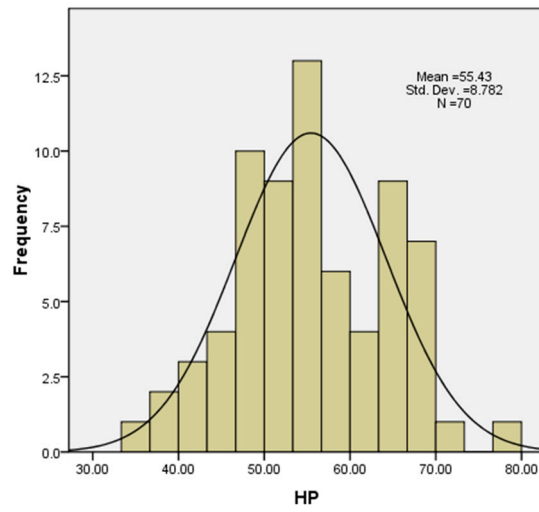

Figure S3. The frequency distribution of the heartwood proportion (HP) of *C. lanceolata* individuals. The x-axis indicates the HP; the y-axis indicates frequency of the HP.

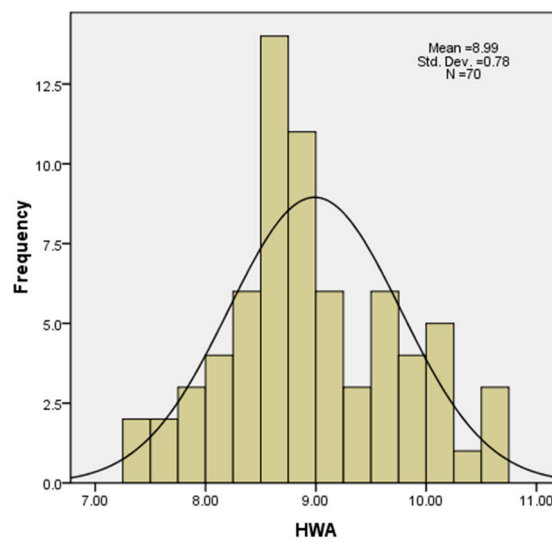

Figure S4. The frequency distribution of the heartwood a\* (HWA) of *C. lanceolata* individuals. The x-axis indicates the HWA; the y-axis indicates frequency of the HWA.

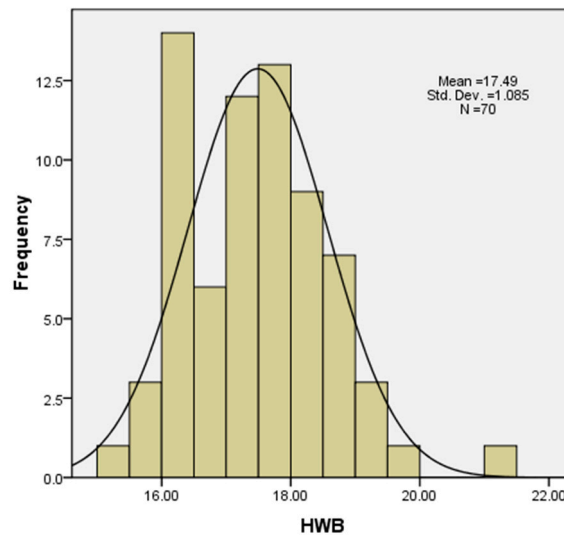

Figure S5. The frequency distribution of the heartwood width (HWB) of *C. lanceolata* individuals. The x-axis indicates the HWB; the y-axis indicates frequency of the HWB.

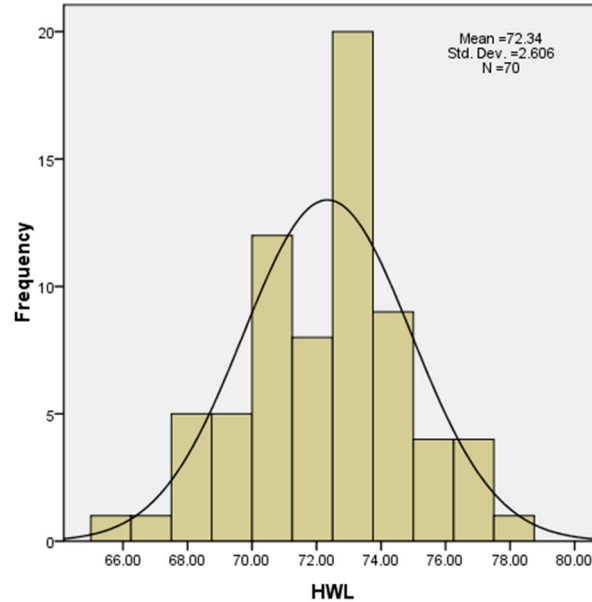

Figure S6. The frequency distribution of the heartwood L\* (HWL) of *C. lanceolata* individuals. The x-axis indicates the HWL; the y-axis indicates frequency of the HWL.

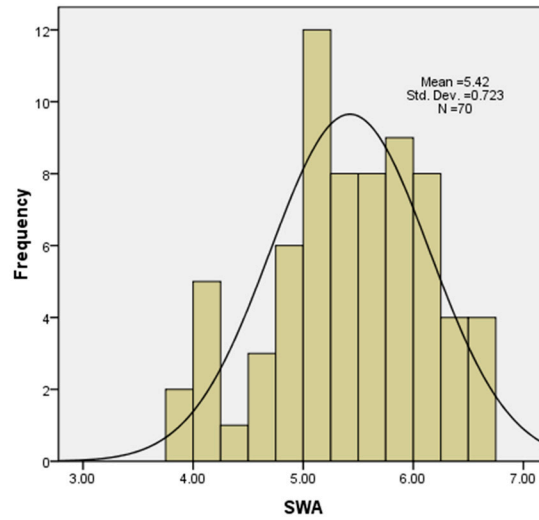

Figure S7. The frequency distribution of the sapwood  $a^*$  (SWA) of *C. lanceolata* individuals. The x-axis indicates the SWA; the y-axis indicates frequency of the SWA.

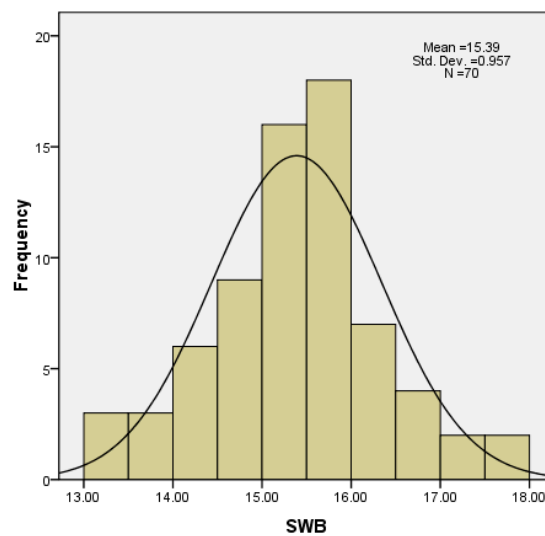

Figure S8. The frequency distribution of the sapwood  $b^*$  (SWB) of *C. lanceolata* individuals. The x-axis indicates the SWB; the y-axis indicates frequency of the SWB.

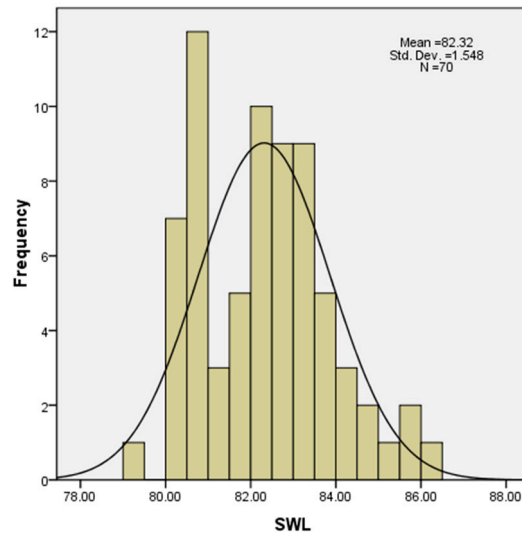

Figure S9. The frequency distribution of the sapwood L\* (SWL) of *C. lanceolata* individuals. The x-axis indicates the SWL; the y-axis indicates frequency of the SWL.
