# Supplementary material for: High-Density Genetic Map and QTL Analysis in Cunninghamia lanceolate: Insights into Growth and Wood-Color Traits
Source: MDPI journal article supplement (doi:10.3390/f14081591), 2023-08-05
Supplement: s1 [file s1]

QTL analysis of growth and wood color traits in F1 family. The table indicates the position and marker numbers of each QTL, genome-wide LOD thresholds, their map position, marker number, marker name and the proportion (%) of the total phenotypic variance (PV) explained.

| Trait                     | LG | Position(cM)    | Marker numbers | Marker name   | LOD  | pv    |
|---------------------------|----|-----------------|----------------|---------------|------|-------|
| Diameter at breast height | 5  | 78.89           | 3              | Marker341953, | 2.11 | 13.30 |
|                           |    |                 |                | Marker194824, | 2.11 | 13.30 |
|                           |    |                 |                | Marker158902  | 2.11 | 13.30 |
|                           | 7  | 12.709          | 14             | Marker42916,  | 2.12 | 13.40 |
|                           |    |                 |                | Marker535429, | 2.12 | 13.40 |
|                           |    |                 |                | Marker506904, | 2.12 | 13.40 |
|                           |    |                 |                | Marker500194, | 2.12 | 13.40 |
|                           |    |                 |                | Marker55545,  | 2.12 | 13.40 |
|                           |    |                 |                | Marker322521, | 2.12 | 13.40 |
|                           |    |                 |                | Marker190622, | 2.12 | 13.40 |
|                           |    |                 |                | Marker216134, | 2.12 | 13.40 |
|                           |    |                 |                | Marker294404, | 2.12 | 13.40 |
|                           |    |                 |                | Marker198482, | 2.12 | 13.40 |
|                           |    |                 |                | Marker259959, | 2.12 | 13.40 |
|                           |    |                 |                | Marker217202, | 2.12 | 13.40 |
|                           |    |                 |                | Marker227089, | 2.12 | 13.40 |
|                           |    |                 |                | Marker300863  | 2.12 | 13.40 |
| heartwood diameter        | 1  | 98.823          | 1              | Marker466118  | 2.02 | 12.80 |
| heartwood proportion      | 3  | 127.771~129.321 | 11             | Marker232518  | 2.51 | 15.60 |
|                           |    |                 |                | Marker297981  | 2.51 | 15.60 |
|                           |    |                 |                | Marker356559  | 2.51 | 15.60 |
|                           |    |                 |                | Marker430283  | 2.51 | 15.60 |
|                           |    |                 |                | Marker337894  | 2.51 | 15.60 |
|                           |    |                 |                | Marker354402  | 2.51 | 15.60 |
|                           |    |                 |                | Marker149004  | 2.51 | 15.60 |
|                           |    |                 |                | Marker360054  | 2.51 | 15.60 |
|                           |    |                 |                | Marker230391  | 2.51 | 15.60 |
|                           |    |                 |                | Marker211052  | 2.51 | 15.60 |
|                           |    |                 |                | Marker321676  | 2.51 | 15.60 |
|                           | 5  | 64.961          | 2              | Marker470078  | 2.56 | 15.90 |
|                           |    |                 |                | Marker318337  | 2.56 | 15.90 |
| heartwood a*              | 5  | 13.744          | 1              | Marker114211  | 2.07 | 12.70 |
|                           | 5  | 43.119~ 43.53   | 7              | Marker743514  | 2.06 | 12.70 |
|                           |    |                 |                | Marker146479  | 2.06 | 12.70 |
|                           |    |                 |                | Marker271246  | 2.04 | 12.60 |
|                           |    |                 |                | Marker496102  | 2.04 | 12.60 |
|                           |    |                 |                | Marker181901  | 2.04 | 12.60 |
|                           |    |                 |                | Marker148885  | 2.04 | 12.60 |
|                           |    |                 |                | Marker689671  | 2.05 | 12.60 |
|                           | 5  | 72.103~74.63    | 14             | Marker78524   | 2.22 | 14.10 |

|              |    |                 |   |              |      |       |
|--------------|----|-----------------|---|--------------|------|-------|
|              |    |                 |   | Marker180177 | 2.22 | 14.10 |
|              |    |                 |   | Marker130891 | 2.30 | 14.10 |
|              |    |                 |   | Marker377143 | 2.30 | 14.10 |
|              |    |                 |   | Marker163481 | 2.30 | 14.10 |
|              |    |                 |   | Marker508121 | 2.30 | 14.10 |
|              |    |                 |   | Marker105325 | 2.30 | 14.10 |
|              |    |                 |   | Marker127065 | 2.30 | 14.10 |
|              |    |                 |   | Marker367633 | 2.30 | 14.10 |
|              |    |                 |   | Marker395316 | 2.30 | 14.10 |
|              |    |                 |   | Marker46574  | 2.30 | 14.10 |
|              |    |                 |   | Marker186367 | 2.30 | 14.10 |
|              |    |                 |   | Marker71824  | 2.30 | 14.10 |
|              |    |                 |   | Marker266066 | 2.30 | 14.10 |
|              | 5  | 78.89           | 3 | Marker341953 | 2.08 | 12.80 |
|              |    |                 |   | Marker194824 | 2.08 | 12.80 |
|              |    |                 |   | Marker158902 | 2.08 | 12.80 |
|              | 8  | 140.072~142.751 | 2 | Marker442260 | 2.22 | 13.60 |
|              |    |                 |   | Marker313450 | 2.20 | 13.50 |
| heartwood b* | 11 | 59.907          | 3 | Marker97557  | 2.66 | 16.00 |
|              |    |                 |   | Marker311327 | 2.66 | 16.00 |
|              |    |                 |   | Marker377770 | 2.66 | 16.00 |
| heartwood L* | 5  | 43.119~ 43.53   | 7 | Marker743514 | 4.01 | 23.20 |
|              |    |                 |   | Marker146479 | 4.01 | 23.20 |
|              |    |                 |   | Marker271246 | 4.09 | 23.60 |
|              |    |                 |   | Marker496102 | 4.09 | 23.60 |
|              |    |                 |   | Marker181901 | 4.09 | 23.60 |
|              |    |                 |   | Marker148885 | 4.09 | 23.60 |
|              |    |                 |   | Marker689671 | 4.09 | 23.60 |
|              |    |                 |   |              |      |       |
|              | 5  | 46.367          | 7 | Marker165417 | 4.04 | 23.40 |
|              |    |                 |   | Marker163766 | 4.04 | 23.30 |
|              |    |                 |   | Marker357435 | 4.04 | 23.30 |
|              |    |                 |   | Marker478056 | 4.04 | 23.30 |
|              |    |                 |   | Marker191139 | 4.03 | 23.30 |
|              |    |                 |   | Marker68305  | 4.02 | 23.30 |
|              |    |                 |   | Marker268186 | 4.02 | 23.30 |
| sapwood a*   | 3  | 178.158~181.940 | 3 | Marker288895 | 2.51 | 15.20 |
|              |    |                 |   | Marker222650 | 2.50 | 15.20 |
|              |    |                 |   | Marker269785 | 2.57 | 15.60 |
| sapwood L*   | 10 | 135.802~137.718 | 4 | Marker427491 | 2.09 | 12.08 |
|              |    |                 |   | Marker88088  | 2.09 | 12.80 |
|              |    |                 |   | Marker249068 | 2.20 | 13.50 |
|              |    |                 |   | Marker57777  | 2.19 | 13.40 |
|              | 11 | 72.570~73.820   | 4 | Marker223975 | 2.07 | 12.70 |
|              |    |                 |   | Marker215084 | 2.07 | 12.70 |

|  |   |        |   |              |      |       |
|--|---|--------|---|--------------|------|-------|
|  |   |        |   | Marker312614 | 2.07 | 12.70 |
|  |   |        |   | Marker370394 | 2.07 | 12.70 |
|  | 8 | 21.831 | 1 | Marker172270 | 2.30 | 14.00 |

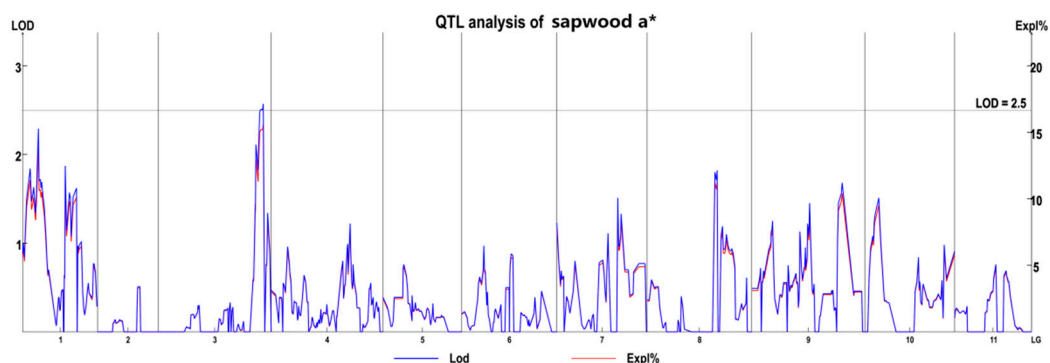

Logarithm of odds (LOD) and percent phenotypic variance explained (PVE) curves for sapwood a\*. The blue curve indicates LOD scores of SLAF markers against their genetic position on genetic map. The red curve indicates the PVE of SLAF markers against their genetic position genetic map. The gray line indicates the threshold LOD score.

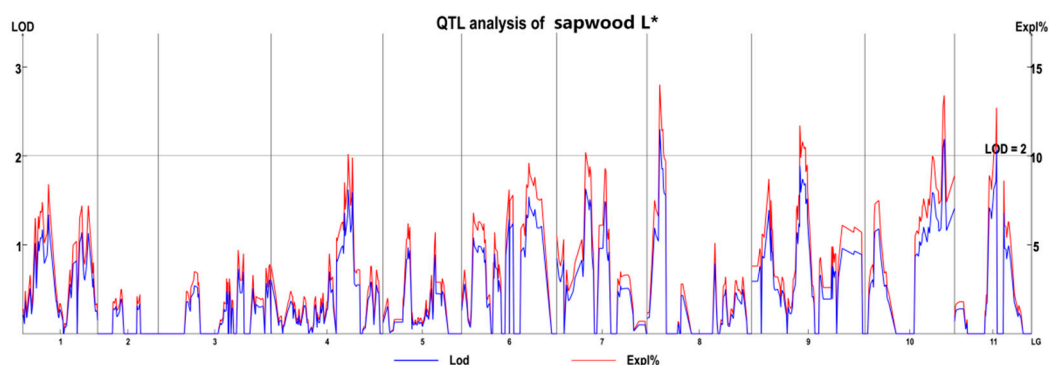

Logarithm of odds (LOD) and percent phenotypic variance explained (PVE) curves for sapwood L\*. The blue curve indicates LOD scores of SLAF markers against their genetic position on genetic map. The red curve indicates the PVE of SLAF markers against their genetic position genetic map. The gray line indicates the threshold LOD score.

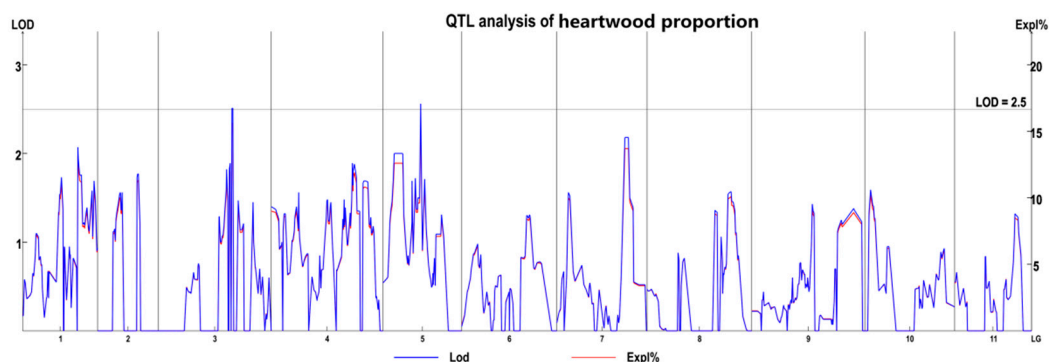

Logarithm of odds (LOD) and percent phenotypic variance explained (PVE) curves for heartwood proportion. The blue curve indicates LOD scores of SLAF markers against their genetic position

on genetic map. The red curve indicates the PVE of SLAF markers against their genetic position on genetic map. The gray line indicates the threshold LOD score.

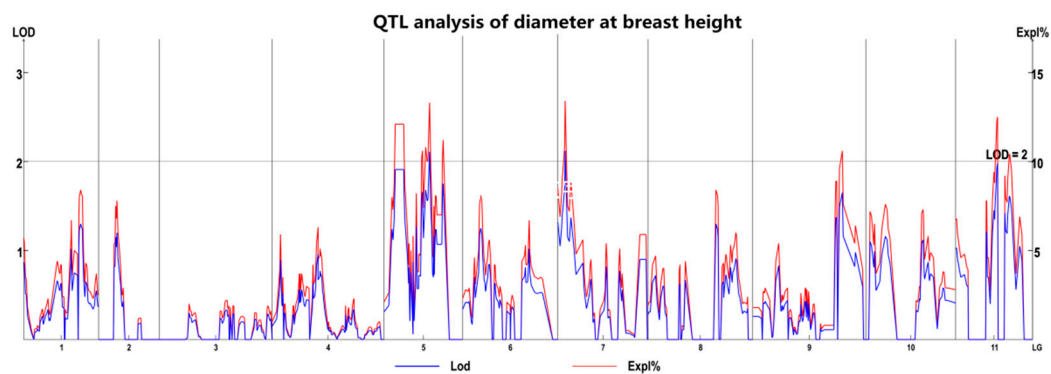

Logarithm of odds (LOD) and percent phenotypic variance explained (PVE) curves for diameter at breast height. The blue curve indicates LOD scores of SLAF markers against their genetic position on genetic map. The red curve indicates the PVE of SLAF markers against their genetic position genetic map. The gray line indicates the threshold LOD score.

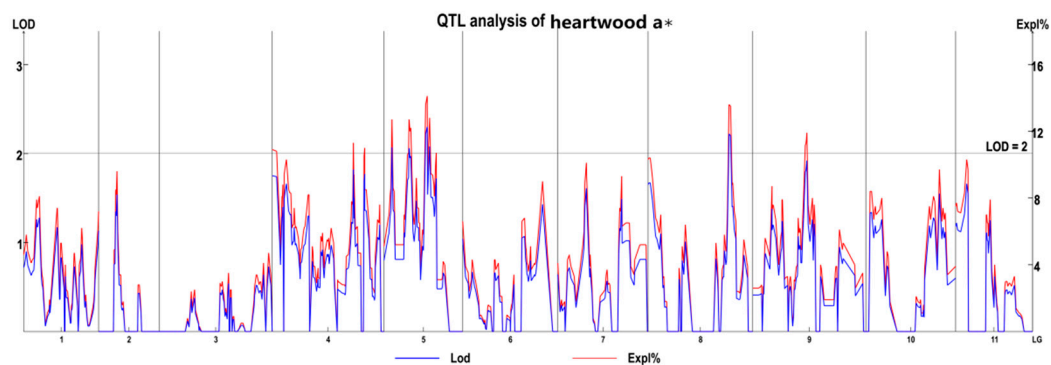

Logarithm of odds (LOD) and percent phenotypic variance explained (PVE) curves for heartwood a\*. The blue curve indicates LOD scores of SLAF markers against their genetic position on genetic map. The red curve indicates the PVE of SLAF markers against their genetic position genetic map. The gray line indicates the threshold LOD score.

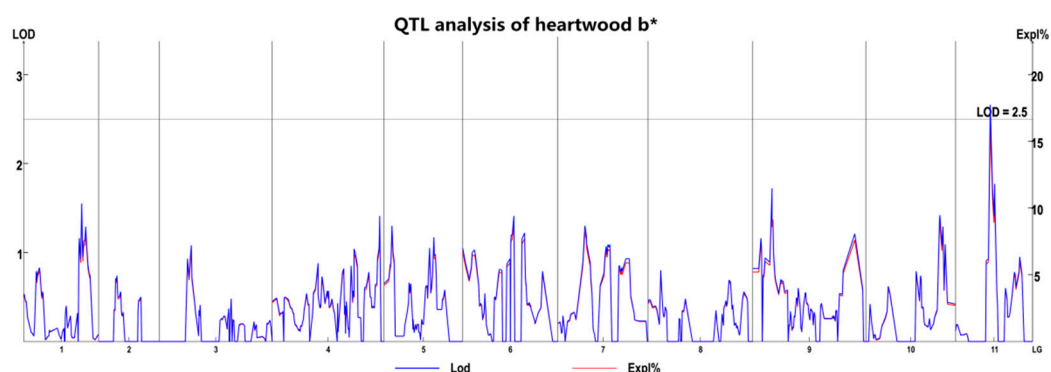

Logarithm of odds (LOD) and percent phenotypic variance explained (PVE) curves for heartwood b\*. The blue curve indicates LOD scores of SLAF markers against their genetic position on genetic map. The red curve indicates the PVE of SLAF markers against their genetic position genetic map. The gray line indicates the threshold LOD score.

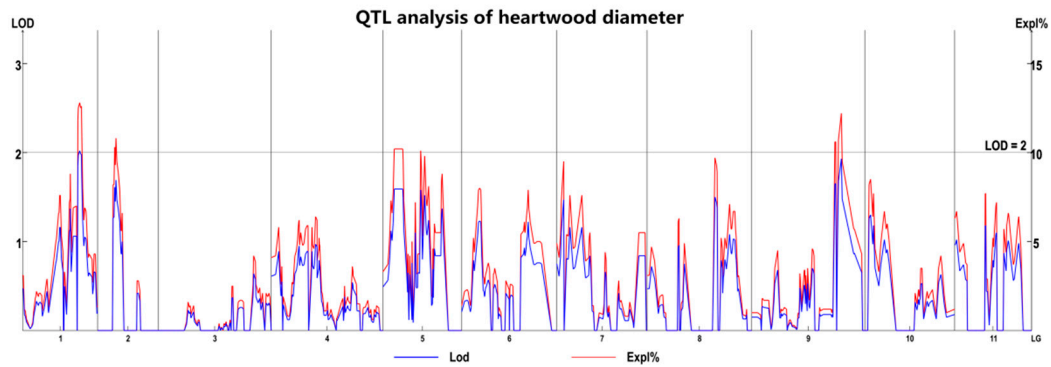

Logarithm of odds (LOD) and percent phenotypic variance explained (PVE) curves for heartwood diameter. The blue curve indicates LOD scores of SLAF markers against their genetic position on genetic map. The red curve indicates the PVE of SLAF markers against their genetic position genetic map. The gray line indicates the threshold LOD score.

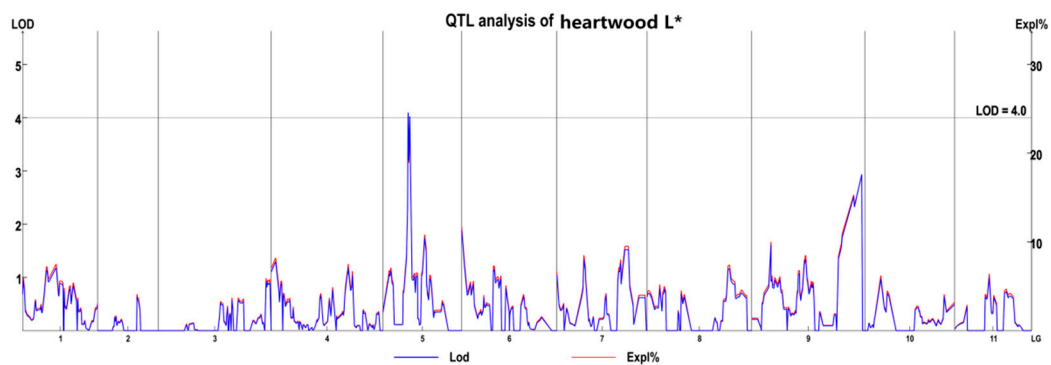

Logarithm of odds (LOD) and percent phenotypic variance explained (PVE) curves for heartwood L\*. The blue curve indicates LOD scores of SLAF markers against their genetic position on genetic map. The red curve indicates the PVE of SLAF markers against their genetic position genetic map. The gray line indicates the threshold LOD score.

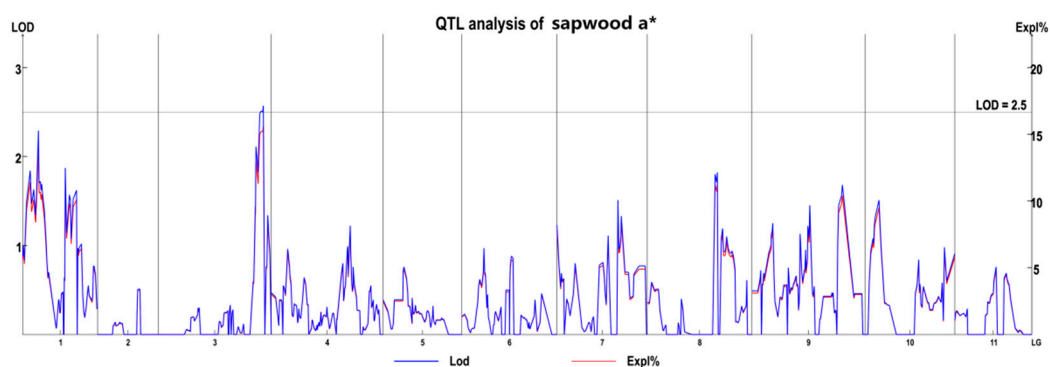

Logarithm of odds (LOD) and percent phenotypic variance explained (PVE) curves for sapwood a\*. The blue curve indicates LOD scores of SLAF markers against their genetic position on genetic map. The red curve indicates the PVE of SLAF markers against their genetic position genetic map. The gray line indicates the threshold LOD score.

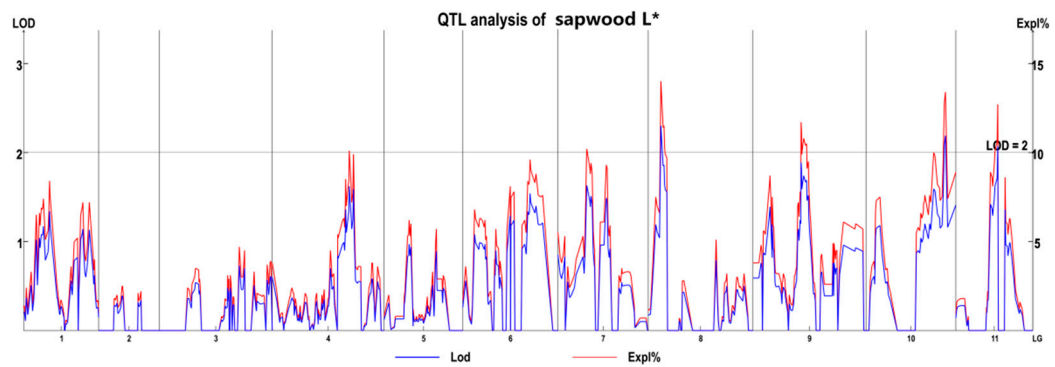

Logarithm of odds (LOD) and percent phenotypic variance explained (PVE) curves for sapwood L\*. The blue curve indicates LOD scores of SLAF markers against their genetic position on genetic map. The red curve indicates the PVE of SLAF markers against their genetic position on genetic map. The gray line indicates the threshold LOD score.
